# Supplementary material for: Role of sedation for agitated patients undergoing noninvasive ventilation: clinical practice in a tertiary referral hospital
Source: BMC Pulm Med. 2015 Jul 13;15:71. doi: 10.1186/s12890-015-0072-5 (PMC4499444; doi:10.1186/s12890-015-0072-5)
Supplement: Additional file 2: — Changes in pH and P/F ratio within 24 h after initiation of each sedative. P/F, PaO2/FiO2. *Comparison of change in pH and PaO2/FiO2 ratio between intermittent and continuous use groups. [file 12890_2015_72_MOESM2_ESM.xlsx]

## Sheet: Sheet1
		Intermittent			Continuous
		Before	After	P-value	Before	After	P-value	P’-value*
	pH	7.37 ± 0.09	7.39 ± 0.06	0.1	7.39 ± 0.07	7.37 ± 0.11	0.39	0.12
	P/F ratio	175.4 ± 83.4	185.8 ± 72.8	0.28	131.6 ± 71.8	142.3 ± 94.9	0.57	0.76
